# Supplementary material
Source: Springer Nature journal article supplement (https://www.springermedizin.de/resource/supplementary/12978_2010_94_MOESM1_ESM.pdf/9602826)
Supplement: MOESM1 [file 9602826]

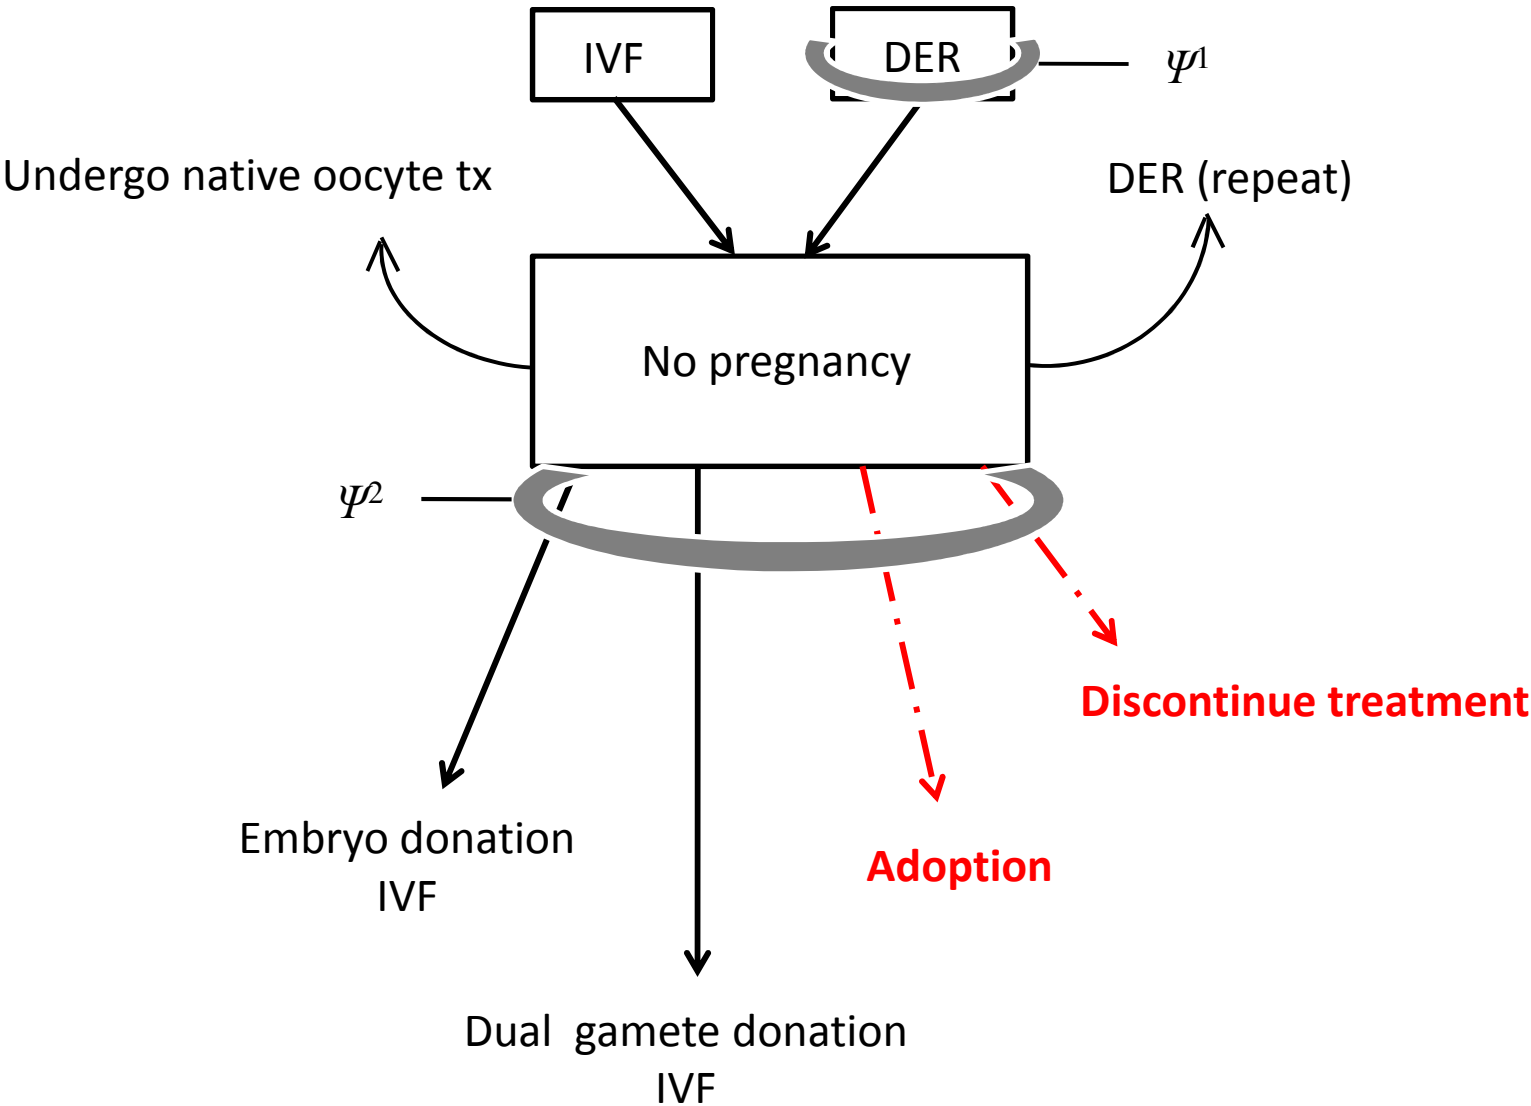

IVF

DER

$\psi^1$

Undergo native oocyte tx

DER (repeat)

No pregnancy

$\psi^2$

Embryo donation  
IVF

Dual gamete donation  
IVF

Adoption

Discontinue treatment
